# Supplementary material for: Single-walled carbon nanotubes displaying multivalent ligands for capturing pathogens
Source: Royal Society of Chemistry journal article supplement (doi:10.1039/b415015e), 2004-12-17
Supplement: b415015e.pdf [file b415015e.pdf]

**Electronic Supplementary Information**

**Single-Walled Carbon Nanotubes Displaying Multivalent  
Ligands for Capturing Pathogens**

**(MS# B415015E)**

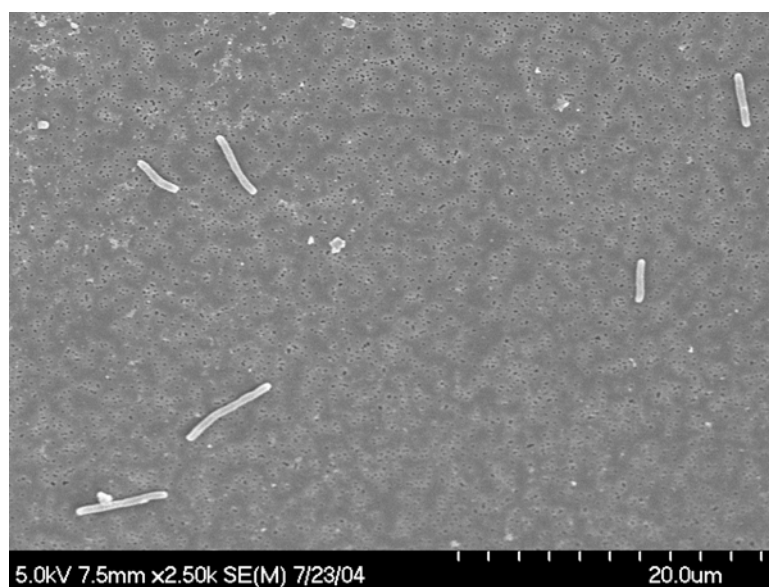

Figure S1. SEM image from the control experiment with *E. coli* O157:H7 and BSA-functionalized SWNTs. Other experimental procedure and conditions were kept the same.

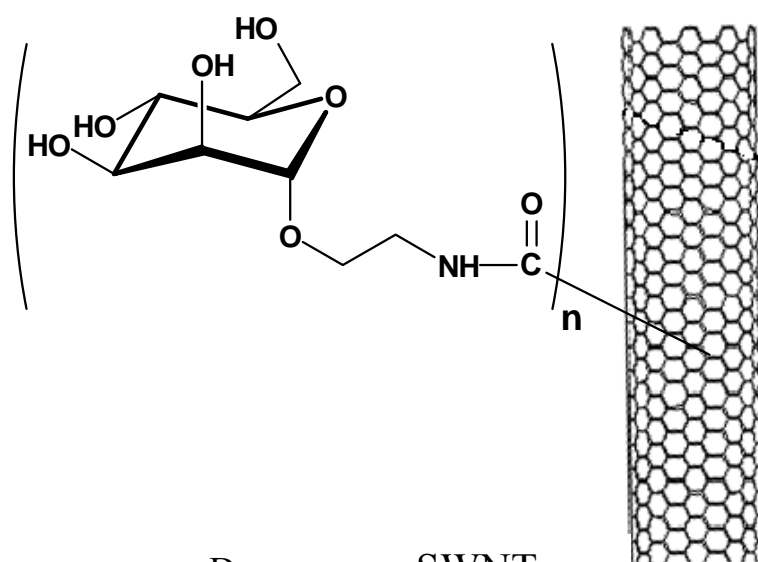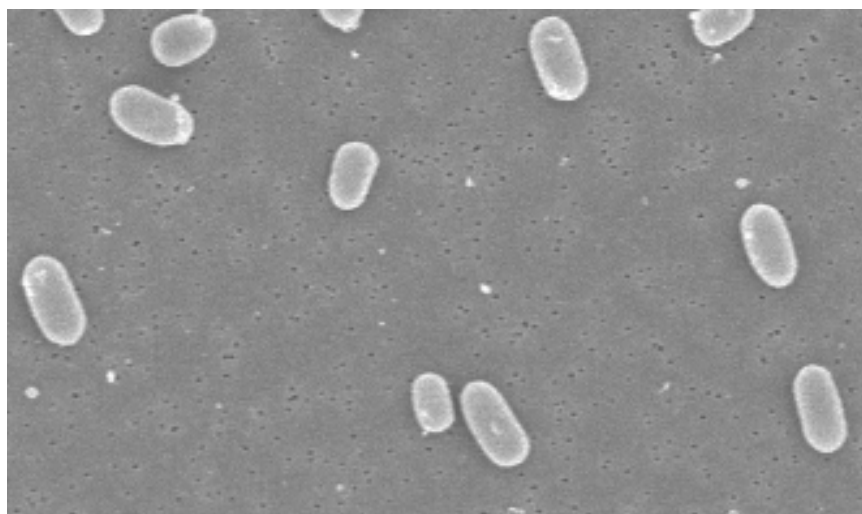

Figure S2. SEM image from the control experiment with *E. coli* O157:H7 and  $\alpha$ -D-mannose-SWNT. Other experimental procedure and conditions were kept the same.
